# Supplementary material
Source: PubMed Central journal article supplement (PMC1458851)

bsk CK2 $\alpha$  dbt gish Tak1

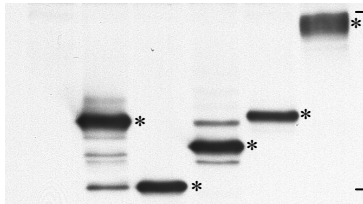

1

2

3

4

5

6

kinases-V5

Supplement: pnas_0511215103_1.pdf [file pnas_0511215103_1.pdf]

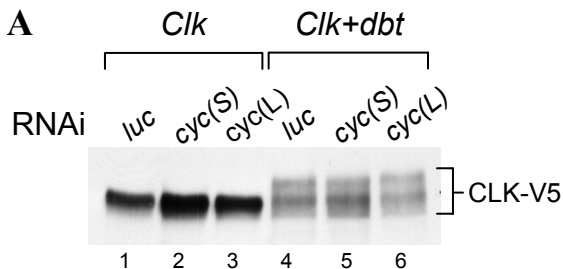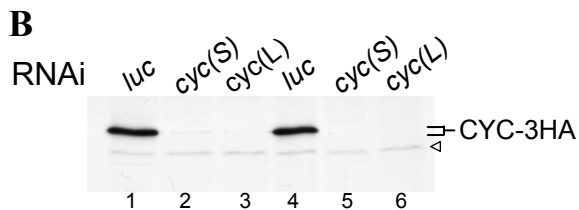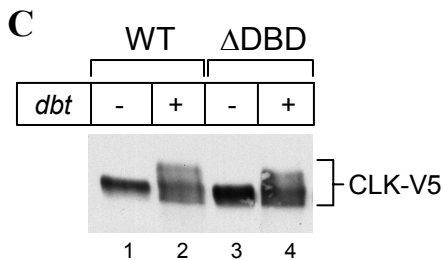

Supplement: pnas_0511215103_2.pdf [file pnas_0511215103_2.pdf]

**A**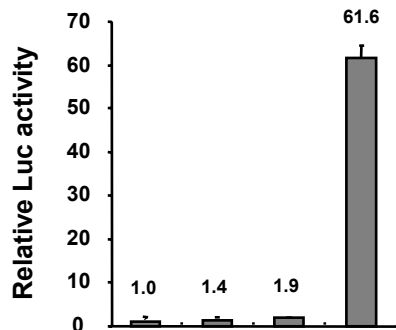

|            |   |                                                                                   |   |   |
|------------|---|-----------------------------------------------------------------------------------|---|---|
| <i>Clk</i> | - | -                                                                                 | - | + |
| <i>dbt</i> | - |  | - | - |
|            | 1 | 2                                                                                 | 3 | 4 |

**B**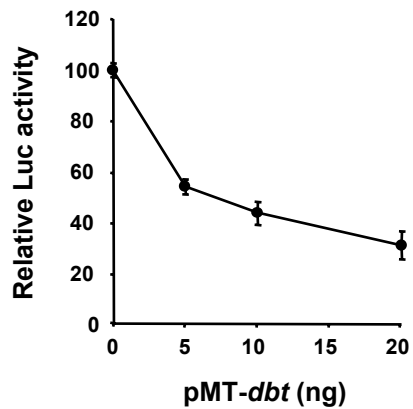

Supplement: pnas_0511215103_3.pdf [file pnas_0511215103_3.pdf]

**A**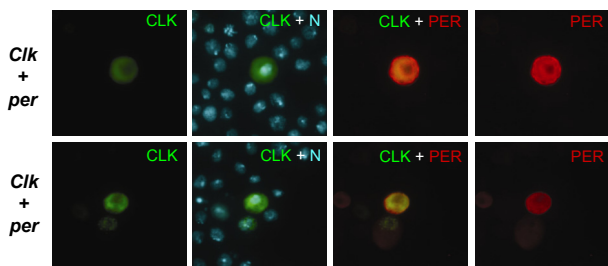**B**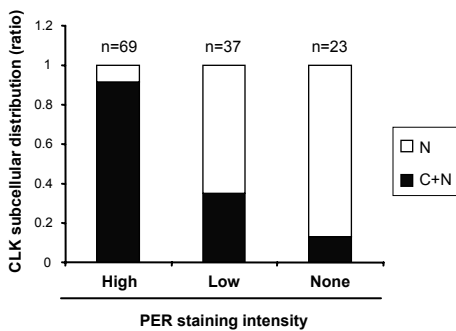**C**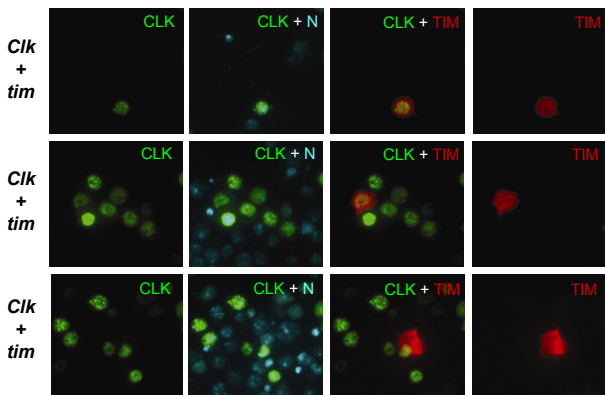

Supplement: pnas_0511215103_4.pdf [file pnas_0511215103_4.pdf]
